# Supplementary material for: Transformations, interactions, and acute biological responses of nanoplastics on mixotrophic microalgae Poterioochromonas malhamensis
Source: Royal Society of Chemistry journal article supplement (doi:10.1039/d3en00324h), 2023-01-01
Supplement: d3en00324h1.pdf [file d3en00324h1.pdf]

## Supporting information

### **Transformations, interaction, and acute biological response of nanoplastics on mixotrophic microalgae *Peteriochromonas Malhamensis***

Zijiao Meng, Serge Stoll, Wei Liu \*

Department F.-A. Forel for Environmental and Aquatic sciences, University of Geneva, Carl-Vogt 66, CH-1211 Geneva, Switzerland.

**\* Corresponding author:**

Wei Liu

Department F.A. Forel for Environmental and Aquatic Sciences

University of Geneva, Carl-Vogt 66, CH-1211, Geneva, Switzerland.

E-mail: wei.liu@unige.ch

Tel: +41223790314

## **Content**

1. Composition of Lake Geneva water
2. Composition of Culture medium
3. Two-way ANOVA with the factors of concentration and size
4. Microscope observations of PS-NPLs on *P. malhamensis*. (Lake Geneva water and Culture medium)
5. correlation analysis based on 12 keys parameters between the surface properties and biological response of the tested PS-NPLs

## 1. Composition of Lake Geneva water

**Table S1.** Composition of Lake Geneva water (pH 8.05±0.1, Cond.288±1µS/cm) used in this study

| Compounds        | Concentration | Compounds                     | Concentration |
|------------------|---------------|-------------------------------|---------------|
| Ca <sup>2+</sup> | 1.03µM        | HCO <sub>3</sub> <sup>-</sup> | 1.41µM        |
| Mg <sup>2+</sup> | 0.24µM        | SO <sub>4</sub> <sup>2-</sup> | 0.55µM        |
| K <sup>+</sup>   | 0.04µM        | PO <sub>4</sub> <sup>3-</sup> | 0.32nM        |
| Na <sup>+</sup>  | 0.30µM        | Cl <sup>-</sup>               | 0.26µM        |
| DOC              | 0.96mg        |                               |               |

## 2. Composition of Culture medium

**Table S2.** Composition of culture medium (pH 7.03 ± 0.1, Cond.672±1µS/cm) used in this study

| Compounds                                           | Concentration | Compounds                              | Concentration |
|-----------------------------------------------------|---------------|----------------------------------------|---------------|
| KNO <sub>3</sub>                                    | 1.0mM         | Na <sub>2</sub> EDTA.2H <sub>2</sub> O | 8.06µM        |
| MgSO <sub>4</sub> .7H <sub>2</sub> O                | 81µM          | FeSO <sub>4</sub> .7H <sub>2</sub> O   | 17.9µM        |
| (NH <sub>4</sub> ) <sub>2</sub> HPO <sub>4</sub>    | 0.15mM        | MnCl <sub>2</sub> .4H <sub>2</sub> O   | 0.73nM        |
| Ca (NO <sub>3</sub> ).4H <sub>2</sub> O             | 0.42mM        | ZnSO <sub>4</sub> .7H <sub>2</sub> O   | 73nM          |
| HEPES                                               | 1mM           | CoCl <sub>2</sub> .6H <sub>2</sub> O   | 16.8nM        |
| H <sub>3</sub> BO <sub>3</sub>                      | 18.43µM       | Vitamin B <sub>12</sub>                | 0.15nM        |
| Na <sub>2</sub> SiO <sub>3</sub> .9H <sub>2</sub> O | 0.5mM         | Thiamine. HCl                          | 300nM         |
| Yeast extract                                       | 0.05%         | Biotin                                 | 4.1nM         |
| Glucose                                             | 0.05%         | Niacinamide                            | 0.8nM         |
| Beef extract                                        | 0.05%         | Peptone                                | 0.4%          |

### 3. Two-way ANOVA with the factors of concentration and size

**Table S3.** Cell inhibition, cell counting, chlorophyll a content, ROS production, PI and cellular uptake by Two-way ANOVA with factors of concentration and size

| Two-way ANOVA | Concentration |         | Size |         | Concentration*Size |         |
|---------------|---------------|---------|------|---------|--------------------|---------|
|               | Lake          | Culture | Lake | Culture | Lake               | Culture |
| Cell count    | **            | **      | **   | *       | ***                | *       |
| Chlorophyll a | ****          | ns      | **   | ns      | ***                | ns      |
| ROS           | **            | ns      | *    | ns      | **                 | **      |
| PI            | ns            | ns      | ns   | ns      | *                  | ns      |
| Uptake        | *             | ****    | **   | **      | *                  | *       |

### 4. Microscope observations of PS-NPLs on *P.malhamensis*. (Lake Geneva water and Culture medium)

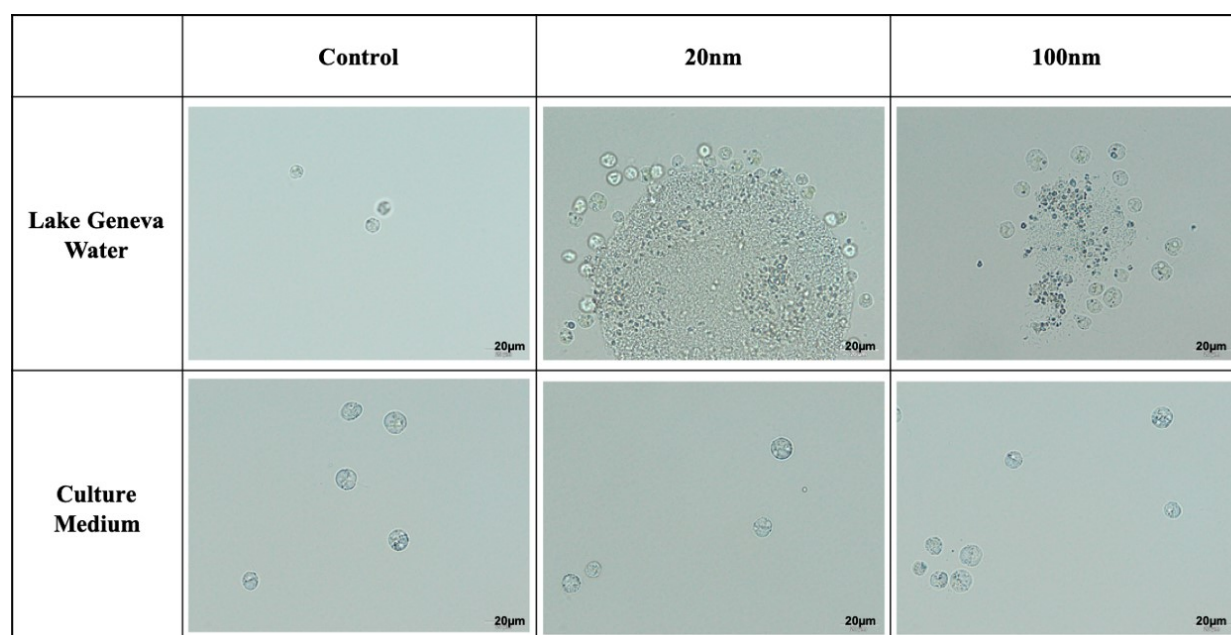

**Fig S1.** Microscope images of PS-NPLs on *P.malhamensis* in Lake Geneva water and in culture medium at 24h. Scale bars: 20µm.

## 5. correlation analysis based on 12 keys parameters between the surface properties and biological response of the tested PS-NPLs

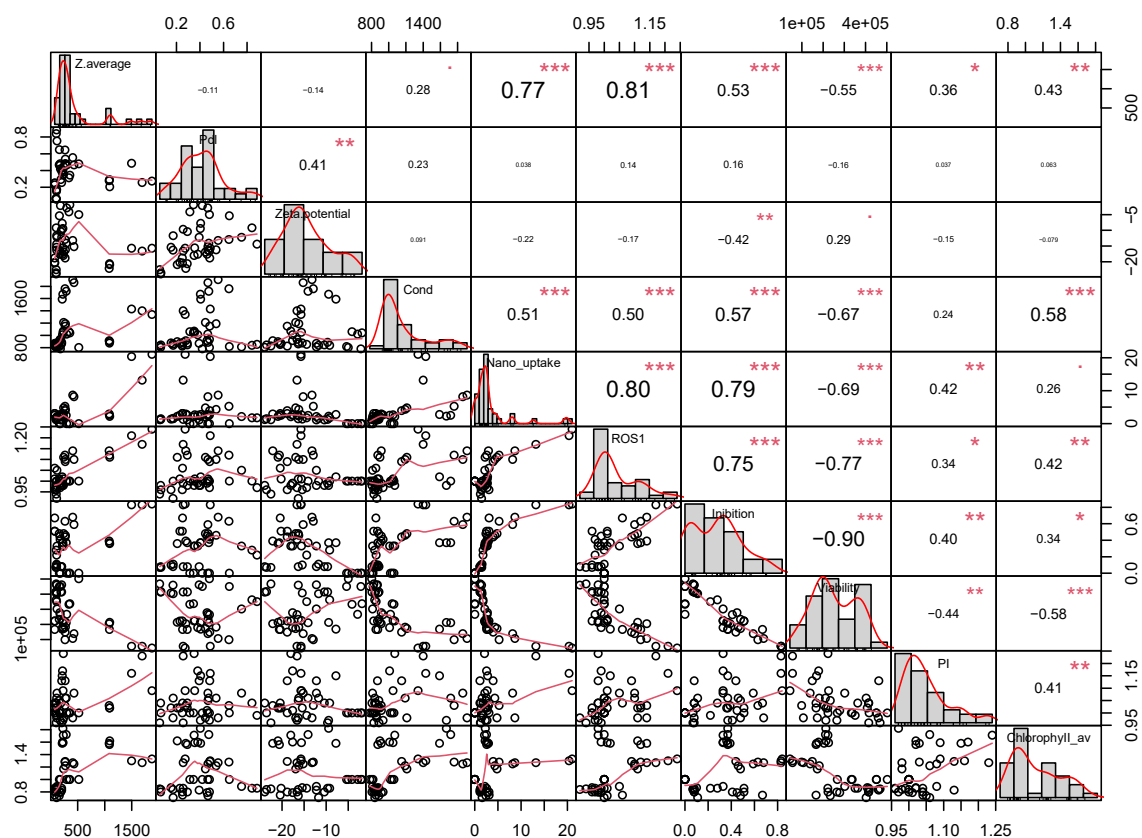

Fig. S2 correlation analysis based on 12 keys parameters:  $\zeta$ -potential, conductivity, z-average hydrodynamic diameter, PDI, pH, concentration and ROS, uptake, cell counting, inhibition, PI and chlorophyll a content in *P.malhamensis* of 20nm and 100nm PS-NPLs in Lake Geneva water and in culture medium. \*\*\*  $p < 0.001$ , \*\*  $p < 0.01$ , \*  $p < 0.05$ .
